# Supplementary material for: Tapinarof, an Aryl Hydrocarbon Receptor Ligand, Mitigates Fibroblast Activation in Thyroid Eye Disease: Implications for Novel Therapy
Source: PubMed Central journal article supplement — Invest Ophthalmol Vis Sci. 2024 Nov 19;65(13):40. doi: 10.1167/iovs.65.13.40 (PMC11578154; doi:10.1167/iovs.65.13.40), 2024-11-19
Supplement: iovs-65-13-40_s001.pdf [file iovs-65-13-40_s001.pdf]

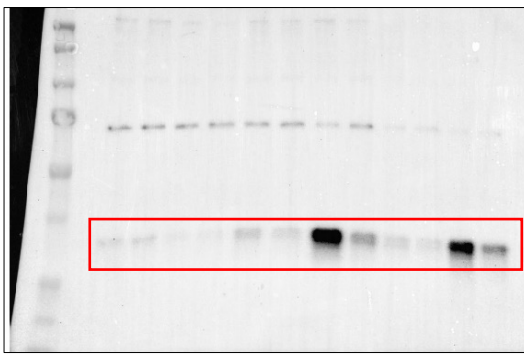

**1<sup>st</sup>: Thymidylate synthase**

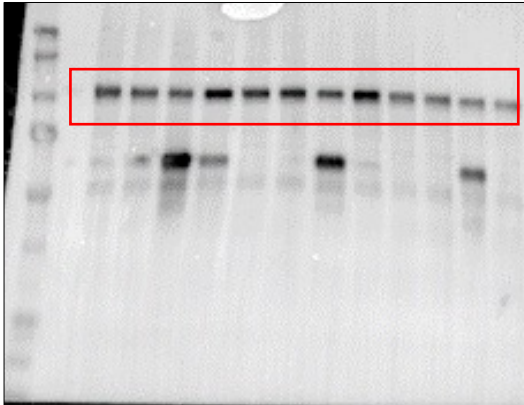

**2<sup>nd</sup>: AHR**

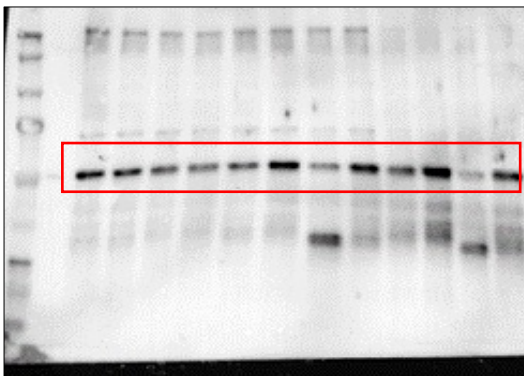

**3<sup>rd</sup>: CYP1B1**

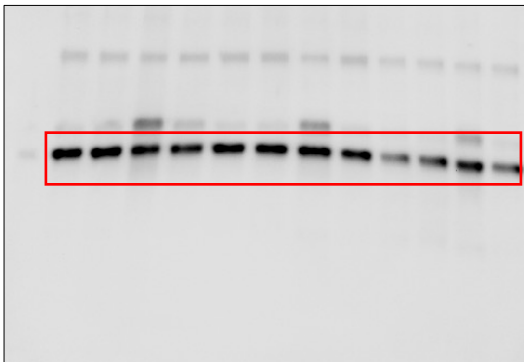

**4<sup>th</sup>:  $\beta$ -Tubulin**

**Supplemental Figure 1:** Full length blots to accompany Figure 2A and 2C. Molecular weight marker is shown in the far left lane. The blot images are from the same membrane showing probing from Thymidylate synthase (1<sup>st</sup>), AHR (2<sup>nd</sup>), CYP1B1 (3<sup>rd</sup>), and  $\beta$ -Tubulin (4<sup>th</sup>). The red box indicates the portion of the blot shown in representative figures.

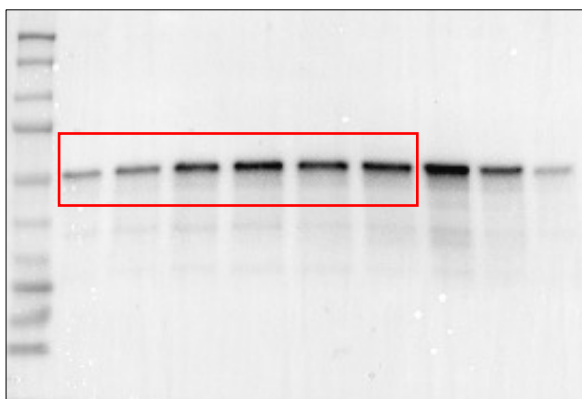

**1<sup>st</sup>: CYP1B1**

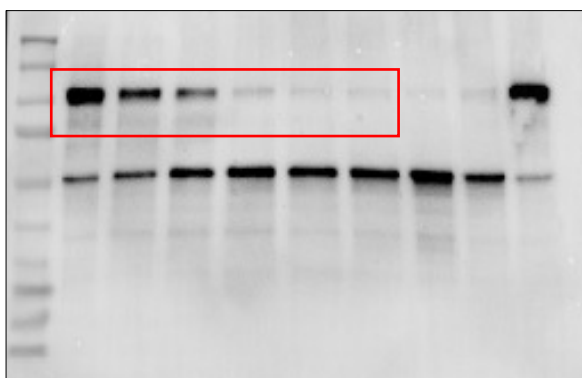

**2<sup>nd</sup>: AHR**

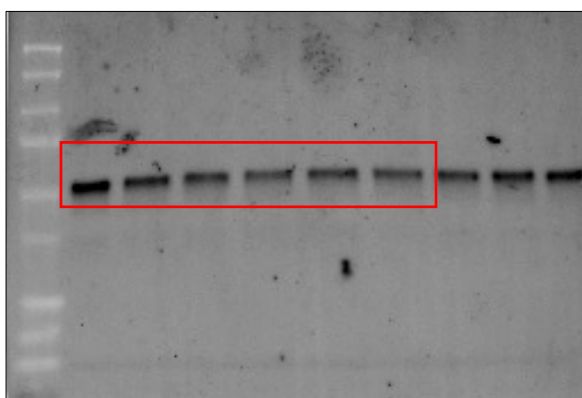

**3<sup>rd</sup>:  $\beta$ -Tubulin**

**Supplemental Figure 2:** Full length blots to accompany Figure 3B. Molecular weight marker is shown in the far left lane. The blot images are from the same membrane showing probing for AHR (1<sup>st</sup>), CYP1B1 (2<sup>nd</sup>), and  $\beta$ -Tubulin (3<sup>rd</sup>). The red box indicates the portion of the blot shown in representative figures.

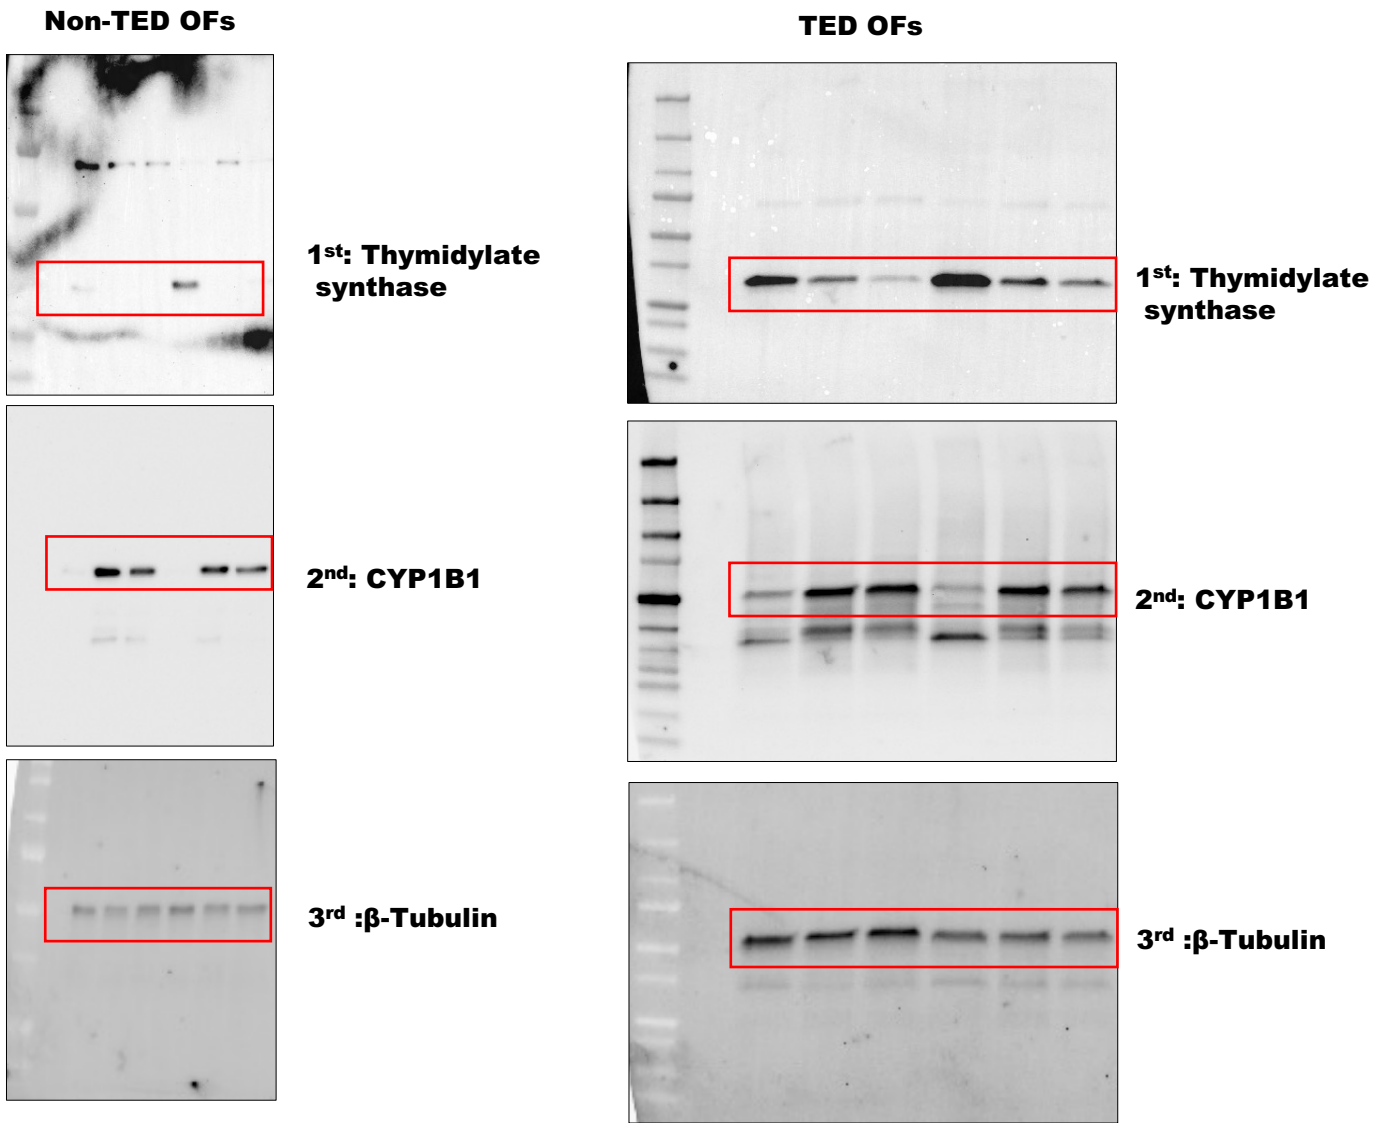

**Supplemental Figure 3:** Full length blots to accompany Figure 3E. Molecular weight marker is shown in the far left lane. The blot images are from the same membrane (Non-TED or TED) showing probing for Thymidylate synthase (1<sup>st</sup>), CYP1B1 (2<sup>nd</sup>), and  $\beta$ -Tubulin (3<sup>rd</sup>). The red box indicates the portion of the blot shown in representative figures.
