# Supplementary material for: Tapinarof, an Aryl Hydrocarbon Receptor Ligand, Mitigates Fibroblast Activation in Thyroid Eye Disease: Implications for Novel Therapy
Source: PubMed Central journal article supplement — Invest Ophthalmol Vis Sci. 2024 Nov 19;65(13):40. doi: 10.1167/iovs.65.13.40 (PMC11578154; doi:10.1167/iovs.65.13.40), 2024-11-19
Supplement: iovs-65-13-40_s002.pdf [file iovs-65-13-40_s002.pdf]

| Gene            | Forward                      | Reverse                        |
|-----------------|------------------------------|--------------------------------|
| <i>CYP1B1</i>   | 5'-CTATCACTGACATCTTCGGCG-3'  | 5'-CATACAAGGCAGACGGTCC-3'      |
| <i>TYMS</i>     | 5'-TGAATCACATCGAGCCACTG-3'   | 5'-TTGGATGCGGATTGTACCC-3'      |
| <i>DHFR</i>     | 5'-GACATGGTCTGGATAGTTGGTG-3' | 5'-TTCAAAGTCTTGATGATCCTTG-3'   |
| <i>JUN</i>      | 5'-GTCATGAACCACGTTAACAGTG-3' | 5'-TCCGTCGCAACTTGTCAAG-3'      |
| <i>18S rRNA</i> | 5'-CTGAGAAACGGCTACCACATC-3'  | 5'-GCCTCGAAAGAGTCCTGTATTG-3'   |
| <i>TBP</i>      | 5'-CGAAACGCCGAATATAATCCC-3'  | 5'-CCCAACTTCTGTACA ACTCTAGC-3' |
| <i>ACTB</i>     | 5'-GCACAGAGCCTCGCCTT-3'      | 5'-CCTTGCACATGCCGGAG-3'        |

**Supplementary Table 1:** Primer sequences used for RT-qPCR.
